# Supplementary material for: BMP Signaling Modulates Hepcidin Expression in Zebrafish Embryos Independent of Hemojuvelin
Source: PubMed Central journal article supplement (PMC3024971; doi:10.1371/journal.pone.0014553), 2011-01-21
Supplement: pone.0014553.s001.pdf [file pone.0014553.s001.pdf]

**Table S1. Sequences of morpholinos used to knockdown *hvj* and other genes.** Exon is abbreviated by E. Mismatch substitutions are shown in lower-case. Sequences targeting the ATG are underlined. Concentrations injected to achieve the reported phenotypes are indicated.

| <b>Morpholino</b> | <b>Target</b>      | <b>Sequence</b>                           | <b>Concentration</b> |
|-------------------|--------------------|-------------------------------------------|----------------------|
| hvj MO1           | ATG                | 5'-CTGATGCTGCC <u>ATT</u> CCCCATCCATAC-3' | 0.2 mM               |
| hvj MO2           | E2 donor           | 5'-AAATTGAATTTTTACCTGATGGAGC-3'           | 0.2 mM               |
| hvj MMO2          | mismatch           | 5'-AAATTcAAaTTTTAgCTcATcGAGC-3'           | 0.2 mM               |
| furina MO[1]      | E9                 | 5'-GAGGGACTCACAATCTGTTTCTCAT-3'           | 0.2 mM               |
| furinb MO[1]      | E9                 | 5'-AGCCCAGATCGACCCTAGAAACACA-3'           | 0.2 mM               |
| neogenin MO[2]    | ATG                | 5'-GGCTCCCCGCTCCG <u>CCAT</u> CACTTTA-3'  | 0.15 mM              |
| mtp2 MO[3]        | E3                 | 5'-GAACACCGCCATCTGAAAACAAATA-3'           | 0.5 mM               |
| RGMa MO           | acceptor<br>5'-UTR | 5'-ACACTTTTGGGTTGAGTTTCTTTTGC-3'          | 0.2 mM               |
| RGMb MO           | ATG                | 5'-AGATCCTGCTCTCCC <u>CAT</u> ACCCATC-3'  | 0.2 mM               |
| RGMd MO           | ATG                | 5'-GTTGAGAGTGCCGCTTCTCCCC <u>ATG</u> -3'  | 0.2 mM               |

### References

1. Walker MB, Miller CT, Coffin Talbot J, Stock DW, Kimmel CB (2006) Zebrafish furin mutants reveal intricacies in regulating Endothelin1 signaling in craniofacial patterning. *Dev Biol* 295: 194-205.
2. Mawdsley DJ, Cooper HM, Hogan BM, Cody SH, Lieschke GJ, et al. (2004) The Netrin receptor Neogenin is required for neural tube formation and somitogenesis in zebrafish. *Dev Biol* 269: 302-315.
3. Silvestri L, Pagani A, Nai A, De Domenico I, Kaplan J, et al. (2008) The serine protease matriptase-2 (TMPRSS6) inhibits hepcidin activation by cleaving membrane hemojuvelin. *Cell Metab* 8: 502-511.
